# Supplementary material for: Mitochondrial Transfer of Wharton’s Jelly Mesenchymal Stem Cells Eliminates Mutation Burden and Rescues Mitochondrial Bioenergetics in Rotenone-Stressed MELAS Fibroblasts
Source: Hindawi journal article supplement (doi:10.1155/2019/9537504), 2019-05-22
Supplement: f1 [file 9537504.f1.pdf]

## Supplementary materials

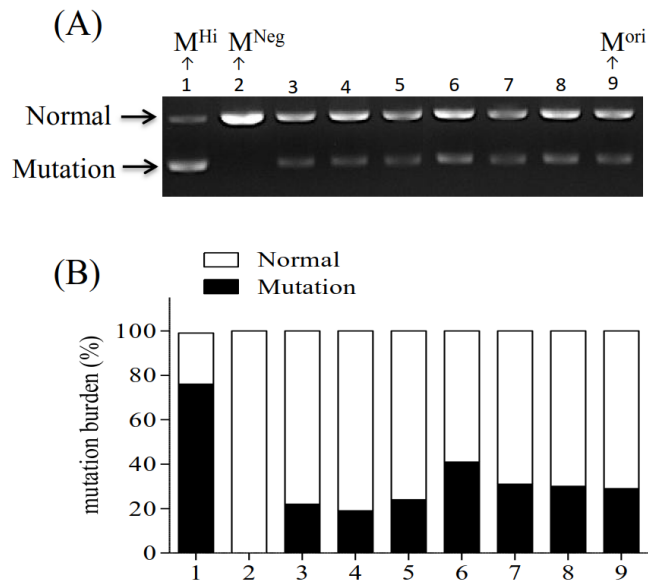

**Figure S1 (related to Figure 1). Single clones with various mt.3243A>G mutation burden.**

Single clones of patient-derived fibroblasts were obtained using clonal dilution. (A) Representative image of mt.3243A>G mutation burden of each fibroblast clone. Mutation (mt3243A>G) was detected using PCR-RFLP. PCR product containing normal mt.3243A was not digested by *Apa I* and showed a 1159 bp band. Mt.3243A>G mutation was *Apa I*-cleaved into 598 and 591 bp band. (B) Quantitative result of mt.3243A>G mutation burden. Con, control fibroblast from normal human. MF<sup>Ori</sup>, original MELAS fibroblast derived from patient. MF<sup>Neg</sup>, MELAS fibroblast clone harboring negative mutation burden. MF<sup>Hi</sup>, MELAS fibroblast clone harboring high mutation burden.

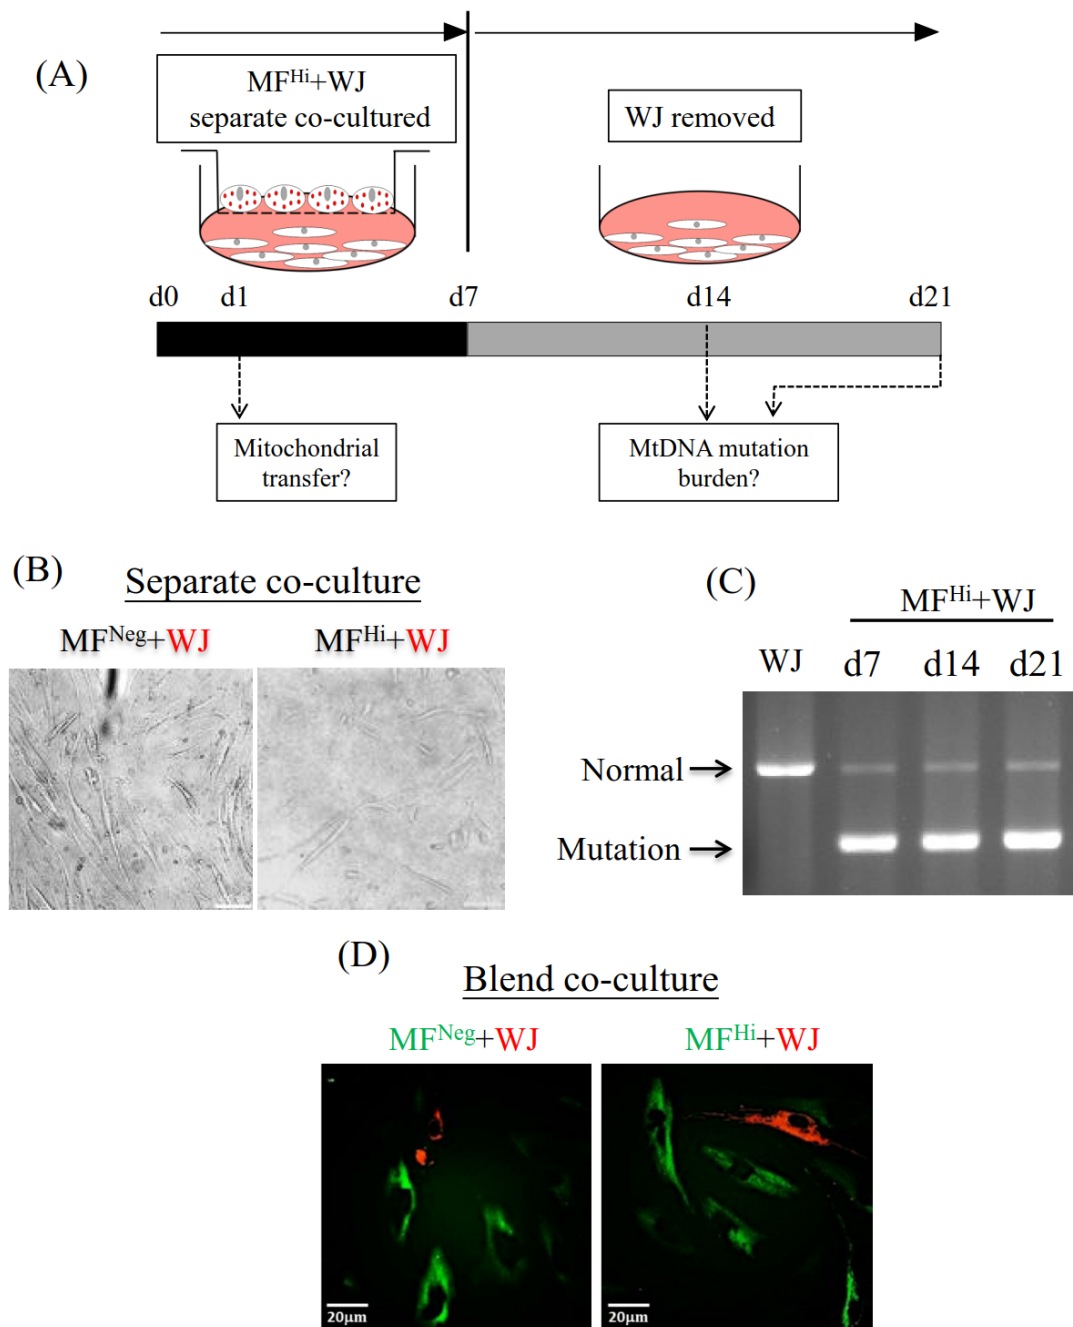

**Figure S2 (related to Figure 2). Mitochondrial transfer from WJMSCs to MELAS fibroblast is undetectable without pre-treatment.** (A) Schematic of experimental course. (B) Representative image was taken with merging red fluorescence signal with bright field one day after separate co-culture. Scale bar, 100  $\mu$ m. Note that no mitochondrial transfer was seen. (C) PCR-RFLP showed that mutation burden was unchanged after separate co-culture. (D) Representative image was taken with merging red and green fluorescence signal one day after blend co-culture. Scale bar, 20  $\mu$ m. WJ, Wharton's jelly mesenchymal stem cell. MF<sup>Neg</sup>, MELAS fibroblast clone harboring negative mutation burden. MF<sup>Hi</sup>, MELAS fibroblast clone harboring high mutation burden.
